# Supplementary material for: Arabidopsis-Based Dual-Layered Biological Network Analysis Elucidates Fully Modulated Pathways Related to Sugarcane Resistance on Biotrophic Pathogen Infection
Source: Front Plant Sci. 2021 Aug 19;12:707904. doi: 10.3389/fpls.2021.707904 (PMC8417329; doi:10.3389/fpls.2021.707904)
Supplement: Supplementary file 5 [file Table_3.xlsx]

## Sheet: Sheet1
Supplemental Table 3. Overview of the MCODE 42 strongly connected component.
Node	Database	Degree centrality	Centrality group	Description IAC DEG	IAC DEG Lowest p-value	Description SP DEG	SP DEG Lowest p-value	GO annotation	KOG annotation	Cell Wall	MAPK	Orthologs	RGA	ROS	TF	Transporter
AT2G37050	biogrid	0.003861	B	nan	comp206328_c0_seq1	nan	gg_03181	GO:0005515;GO:0005515;GO:0000166;GO:0005575;GO:0005737;GO:0005886;GO:0006464;GO:0016301;GO:0000166;GO:0004871;GO:0005515;GO:0005575;GO:0005737;GO:0005886;GO:0006464;GO:0007165;GO:0009719;GO:0016301;GO:0038023	T;T;T;T	nan	nan	AT2G37050, comp206328_c0_seq1, comp207345_c0_seq1, gg_03181, gg_12019	RLK	nan	nan	nan
AT4G37680	biogrid	0.019071	D	nan	comp191682_c0_seq1	nan	comp191682_c0_seq1	GO:0009725;GO:0038023;GO:0009725;GO:0009744;GO:0038023;GO:0000166;GO:0003824;GO:0006139;GO:0006412;GO:0016020	T;T	nan	nan	AT4G37680, comp191682_c0_seq1, gg_04480	nan	nan	nan	nan
ZAR1	biogrid, uniprot	0.002808	B	nan	gg_08036	up	comp174066_c0_seq1	GO:0004674;GO:0004713;GO:0005524;GO:0006468;GO:0009554;GO:0009556;GO:0016021;GO:0031410;GO:0048658;GO:0009987;GO:0044464;GO:0050789;GO:0005886;GO:0006346;GO:0009505;GO:0009570;GO:0016246;GO:0016301;GO:0031048;GO:0048451;GO:0048453;GO:0051567;GO:0005515;GO:0005886;GO:0004674;GO:0005524;GO:0005886;GO:0006346;GO:0006468;GO:0007169;GO:0009505;GO:0009570;GO:0016246;GO:0031048;GO:0048451;GO:0048453;GO:…	T;T;T;T;T	comp174066_c0_seq1:CW; comp184256_c0_seq1:CW; comp184256_c1_seq1:CW; gg_08036:CW	nan	AT2G01210, comp174066_c0_seq1, comp176921_c0_seq1, comp184256_c0_seq1, comp184256_c1_seq1, gg_08036	Other, RLP	nan	nan	nan
FKB42	biogrid, uniprot	0.002106	B	nan	comp186898_c0_seq1	nan	comp186898_c0_seq1	GO:0005515;GO:0000413;GO:0003755;GO:0005516;GO:0005528;GO:0005886;GO:0006457;GO:0048366;GO:0003824;GO:0005622;GO:0005975;GO:0006464;GO:0006810;GO:0007275;GO:0009058;GO:0009987;GO:0019538	O;O	nan	nan	AT3G21640, comp186898_c0_seq1, gg_00038	nan	nan	nan	comp186898_c0_seq1:I-PPI
AT1G53440	biogrid	0.001053	A	nan	comp205417_c0_seq1	up	comp205417_c0_seq1	GO:0005515;GO:0005886;GO:0016310;GO:0004674;GO:0046777	T;T	nan	nan	AT1G53440, comp178914_c0_seq1, comp205417_c0_seq1	Other, RLP	nan	nan	nan
AT3G52190	biogrid	0.000819001	A	nan	comp175986_c0_seq1	nan	comp175986_c0_seq1	GO:0009306;GO:0005739;GO:0005886;GO:0006810;GO:0006950;GO:0008219;GO:0016043	U;U;U	nan	nan	AT3G52190, comp175986_c0_seq1, comp190615_c1_seq1, gg_05933	nan	nan	comp175986_c0_seq1:WD40-like, comp190615_c1_seq1:WD40-like, gg_05933:WD40-like	nan
AT5G45780	biogrid	0.00655201	C	nan	comp204286_c0_seq1	nan	comp204286_c0_seq1	GO:0006468;GO:0004675;GO:0005886;GO:0005515;GO:0009536;GO:0004674;GO:0005524;GO:0005886;GO:0006468;GO:0007169;GO:0009560;GO:0000003;GO:0000166;GO:0005737;GO:0006464;GO:0007275;GO:0016020;GO:0016301;GO:0030154	T;T	nan	nan	AT5G45780, comp204286_c0_seq1, gg_00602	RLK, Other	nan	nan	nan
F4I065	biogrid, uniprot	0.003276	B	nan	nan	nan	nan	nan	T	nan	nan	AT1G49100, comp175778_c0_seq1	Other	nan	nan	comp175778_c0_seq1:MCA
AT3G23410	biogrid	0.001521	B	nan	gg_05009	up	gg_10253	GO:0055114;GO:0005783;GO:0046577;GO:0000166;GO:0003824;GO:0005739;GO:0008152;GO:0009536;GO:0016020;GO:0000166;GO:0003824;GO:0005739;GO:0008152;GO:0016020	C;E;I	nan	nan	AT3G23410, comp191443_c0_seq1, gg_05009, gg_10253	nan	nan	nan	nan
Q9M2R4	biogrid, uniprot	0.001755	B	nan	gg_08584	nan	gg_08584	GO:0000166;GO:0005737;GO:0006464;GO:0007165;GO:0016020;GO:0016301	T	nan	nan	AT3G57830, gg_08584	RLK	nan	nan	nan
AT3G66654	biogrid	0.024804	D	nan	comp191543_c1_seq1	nan	comp191543_c1_seq1	GO:0005797;GO:0003755;GO:0005768;GO:0005794;GO:0005802;GO:0005886;GO:0006457	O	nan	nan	AT3G66654, comp191543_c1_seq1, gg_00629	nan	nan	nan	nan
AT5G58300	biogrid	0.001053	A	nan	comp198324_c1_seq1	up	comp198073_c0_seq1	GO:0042802;GO:0005777;GO:0005515;GO:2000605;GO:0004674;GO:0005524;GO:0005886;GO:0006468;GO:0007169;GO:0010075;GO:0042802;GO:0005777;GO:0005515;GO:2000605;GO:0004674;GO:0005524;GO:0005886;GO:0006468;GO:0007169;GO:0010075;GO:0004674;GO:0005524;GO:0005886;GO:0006468;GO:0007169;GO:0010075;GO:0042802;GO:0005777;GO:0005515;GO:2000605;GO:0004674;GO:0005524;GO:0005886;GO:0006468;GO:0007169;GO:0010075;GO:…	T;T;T;T;T;T	comp189789_c0_seq1:CW; comp198073_c0_seq1:CW; comp198324_c0_seq1:CW; comp198324_c1_seq1:CW; gg_06428:CW; gg_12782:CW	nan	AT5G58300, comp189789_c0_seq1, comp198073_c0_seq1, comp198324_c0_seq1, comp198324_c1_seq1, gg_06428, gg_12782	RLK	nan	nan	nan
AT4G37250	biogrid	0.002457	B	nan	comp50344_c0_seq1	nan	comp50344_c0_seq1	GO:0004674;GO:0005524;GO:0005576;GO:0006468;GO:0007169	T	nan	nan	AT4G37250, comp50344_c0_seq1	nan	nan	nan	comp50344_c0_seq1:MCA
AT1G45145	biogrid	0.00514801	C	nan	comp207652_c0_seq1	nan	comp207652_c0_seq1	GO:0005829;GO:0008047;GO:0016671;GO:0043085;GO:0048046;GO:0050896;GO:0000166;GO:0005623;GO:0019725;GO:0000166;GO:0005623;GO:0006464;GO:0008152;GO:0016301;GO:0019725	C;O;O;T;O;T;C;O	nan	nan	AT1G45145, comp191387_c1_seq1, comp207652_c0_seq1, gg_10093, gg_14228	Other	nan	nan	nan
AT2G26180	biogrid	0.030654	D	nan	gg_10471	up	gg_10593	nan	S;S	gg_10471:CW	nan	AT2G26180, gg_10471, gg_10593	nan	nan	nan	nan
AT2G16250	biogrid	0.003978	B	down	comp201385_c0_seq1	nan	comp201385_c0_seq1	GO:0005515;GO:0016021;GO:0005886;GO:0007165;GO:0009505;GO:0009506;GO:0009791;GO:0048367;GO:0048513;GO:0005515;GO:0016021;GO:0002237;GO:0004674;GO:0005524;GO:0005886;GO:0006468;GO:0007169;GO:0009505;GO:0009506;GO:0010103;GO:0048443;GO:0005515;GO:0016021;GO:0008150;GO:0009987;GO:0050896;GO:0071944	T;T;T	comp201385_c0_seq1:CW; comp205027_c0_seq1:CW	nan	AT2G16250, comp201385_c0_seq1, comp205027_c0_seq1, comp206438_c0_seq1	RLK	nan	nan	nan
AT1G07650	biogrid	0.003861	B	nan	comp206126_c0_seq1	up	gg_05103	GO:0005515;GO:0005886;GO:0016310;GO:0004674;GO:0046777;GO:0000166;GO:0005575;GO:0005886;GO:0006464;GO:0007165;GO:0009719;GO:0016301;GO:0000166;GO:0006464;GO:0016301	T;T;T	gg_05103:CW	comp206126_c0_seq1:RAF-LIKE, gg_06494:RAF-LIKE	AT1G07650, comp206126_c0_seq1, gg_05103, gg_06494	RLP	nan	nan	nan
AT5G49770	biogrid	0.002457	B	nan	comp172962_c0_seq1	nan	nan	GO:0004674;GO:0005524;GO:0005576;GO:0006468;GO:0007169;GO:0010413;GO:0045492	T	nan	nan	AT5G49770, comp172962_c0_seq1	Other	nan	nan	nan
AT5G51560	biogrid	0.00573301	C	nan	comp185234_c0_seq1	nan	comp185234_c0_seq1	GO:0006468;GO:0005886;GO:0016021;GO:0004674;GO:0005524;GO:0005886;GO:0006468;GO:0007169;GO:0010075	T	nan	nan	AT5G51560, comp185234_c0_seq1	RLK	nan	nan	nan
SRF1	biogrid, uniprot	0.002223	B	nan	gg_03917	nan	comp199403_c0_seq1	GO:0005515;GO:0005886;GO:0006468;GO:0004675;GO:0004674;GO:0005524;GO:0005886;GO:0006468;GO:0007169;GO:0007623;GO:0000166;GO:0005737;GO:0006464;GO:0016020;GO:0016301	T;T	nan	nan	AT2G20850, comp199403_c0_seq1, gg_03917	RLK, RLP	nan	nan	nan
AT4G22130	biogrid	0.004563	C	nan	comp164255_c0_seq1	up	gg_07042	GO:0005576;GO:0005886;GO:0009624;GO:0010075;GO:0016301;GO:0048653;GO:0005515;GO:0005886;GO:0006468;GO:0004675;GO:0005576;GO:0005886;GO:0009624;GO:0010075;GO:0016301;GO:0048653;GO:0009987;GO:0016301;GO:0005515;GO:0005886;GO:0006468;GO:0004675;GO:0005576;GO:0005886;GO:0009624;GO:0010075;GO:0016301;GO:0048653;GO:0005576;GO:0005886;GO:0009624;GO:0010075;GO:0016301;GO:0048653;GO:0005886;GO:0048513;GO:…	T;T;T;T;T;T;T;T	gg_07042:CW	nan	AT4G22130, comp135715_c0_seq1, comp164255_c0_seq1, comp185188_c0_seq1, comp191671_c0_seq1, comp195339_c0_seq1, comp205882_c0_seq1, gg_07042, gg_14963	Other, RLK, RLP	nan	nan	nan
AT4G29180	biogrid	0.003861	B	nan	nan	nan	nan	GO:0016301	T;T	nan	nan	AT4G29180, comp77942_c0_seq1, comp173916_c0_seq1	nan	nan	nan	nan
AT1G75640	biogrid	0.001638	B	nan	nan	nan	nan	GO:0004674;GO:0005524;GO:0005886;GO:0006468;GO:0007169;GO:0016301	nan	nan	nan	AT1G75640, comp133768_c0_seq1	Other	nan	nan	nan
AT1G31420	biogrid	0.004563	C	nan	gg_01723	nan	gg_01723	GO:0005515;GO:0005886;GO:0000166;GO:0005737;GO:0006464;GO:0016020;GO:0016301	T;T	nan	nan	AT1G31420, comp204622_c2_seq1, gg_01723	RLK	nan	nan	nan
AT2G36330	biogrid	0.001053	A	nan	gg_03016	nan	gg_03016	GO:0003674;GO:0005634;GO:0005886;GO:0008150;GO:0016020;GO:0005886;GO:0016020;GO:0005886;GO:0016020	S;S;S	nan	nan	AT2G36330, comp192415_c0_seq1, gg_03016, gg_15430	nan	nan	nan	gg_03016:PIMP1
AT2G24130	biogrid	0.000702001	A	nan	gg_04081	nan	comp782602_c0_seq1	GO:0006486;GO:0004674;GO:0005524;GO:0005886;GO:0006468;GO:0007169;GO:0000041;GO:0002237;GO:0007165;GO:0010103;GO:0010359;GO:0048443;GO:0004672;GO:0005515;GO:0005524;GO:0006468;GO:0016020;GO:0016567;GO:0031410;GO:0042742;GO:0009507;GO:0016310;GO:0005886;GO:0009755;GO:0005576;GO:0016021;GO:0004674;GO:0005524;GO:0005886;GO:0006468;GO:0007169;GO:0009987;GO:0009507;GO:0016310;GO:0005886;GO:0009755;GO:…	T;T;T;T;T;G;T;T	nan	nan	AT2G24130, comp43260_c0_seq1, comp93408_c0_seq1, comp142524_c0_seq1, comp188933_c0_seq1, comp190632_c0_seq1, comp190632_c1_seq1, comp205123_c1_seq1, comp782602_c0_seq1, gg_03834, gg_04081	Other, RLP	nan	nan	comp43260_c0_seq1:MCA; comp142524_c0_seq1:MCA; comp188933_c0_seq1:MCA
AT1G14390	biogrid	0.00573301	C	nan	gg_05004	nan	gg_05004	GO:0005886;GO:0004672;GO:0009718;GO:0009744;GO:0009987;GO:0010224;GO:0000166;GO:0006464;GO:0007165;GO:0016301	T;T	comp199117_c2_seq1:CW	nan	AT1G14390, comp199117_c2_seq1, gg_05004	RLK	nan	nan	nan
AT5G25930	biogrid	0.002925	B	down	comp197870_c1_seq1	up	gg_08676	GO:0005886;GO:0006952;GO:0007165;GO:0009725;GO:0033036;GO:0043067;GO:0061024;GO:1901700;GO:0002679;GO:0005886;GO:0006612;GO:0009723;GO:0009738;GO:0010200;GO:0010363;GO:0035556;GO:0043069;GO:0052542;GO:0061025;GO:0002679;GO:0005886;GO:0006612;GO:0009723;GO:0009738;GO:0010200;GO:0010363;GO:0035556;GO:0043069;GO:0052542;GO:0061025;GO:0009507;GO:0009987;GO:0016301;GO:0002679;GO:0005886;GO:0006612;GO:…	T;T;T;T;T;T;T;T;T;T;T;T;T;T;T;T	nan	nan	AT5G25930, comp117593_c0_seq1, comp183673_c0_seq1, comp188847_c0_seq1, comp189427_c9_seq1, comp195874_c1_seq1, comp197870_c1_seq1, comp197998_c0_seq1, comp198356_c1_seq1, comp200002_c0_seq1, comp200215_c2_seq1, comp204852_c0_seq1, comp204983_c1_seq1, comp205315_c1_seq1, gg_04303, gg_08167, gg_08676	Other, RLK, RLP	comp188847_c0_seq1:ROS; comp197870_c1_seq1:ROS; comp197998_c0_seq1:ROS; comp200002_c0_seq1:ROS	nan	comp188847_c0_seq1:CEPR2; comp189427_c9_seq1:MCA; gg_08167:MCA
AT4G23220	biogrid	0.002106	B	nan	comp185937_c0_seq1	nan	comp185937_c0_seq1	GO:0005576;GO:0016301;GO:0005886;GO:0006952;GO:0010033;GO:0043067;GO:0061024;GO:1901700;GO:0008152;GO:0016740	T;T;T	nan	nan	AT4G23220, comp181091_c0_seq1, comp185937_c0_seq1, gg_04064	nan	comp185937_c0_seq1:ROS	nan	nan
1.14.18.5	biogrid, kegg	0.001989	B	nan	comp196846_c0_seq1	nan	comp186248_c0_seq1	GO:0000170;GO:0005783;GO:0005794;GO:0009640;GO:0016126;GO:0046520;GO:0003824;GO:0005488;GO:0005737;GO:0006629;GO:0008152;GO:0009058;GO:0009987;GO:0016020;GO:0005506;GO:0005794;GO:0006633;GO:0009640;GO:0016021;GO:0016491;GO:0031410;GO:0046520;GO:0055114;GO:0005506;GO:0005794;GO:0006633;GO:0009640;GO:0016021;GO:0016491;GO:0031410;GO:0046520;GO:0055114;GO:0016491;GO:0016020;GO:0000170;GO:0005783;GO:…	I;I;I;I;I	nan	nan	AT1G14290, AT1G69640, comp104121_c0_seq1, gg_06097, comp183665_c0_seq1, comp186248_c0_seq1, comp196846_c0_seq1	nan	comp196846_c0_seq1:ROS	nan	nan
PRK1	biogrid, uniprot	0.001521	B	nan	nan	nan	nan	GO:0080092;GO:0005515;GO:0004674;GO:0005524;GO:0005576;GO:0006468;GO:0007169	T	nan	nan	AT5G35390, comp194704_c0_seq1	RLK	nan	nan	nan
AT5G49540	biogrid	0.022698	D	nan	comp191693_c0_seq1	nan	comp191693_c0_seq1	GO:0000045;GO:0030244;GO:0048193;GO:0030244;GO:0048193;GO:0005783;GO:0005975;GO:0006810;GO:0009058;GO:0009987;GO:0016020;GO:0005783;GO:0005975;GO:0006810;GO:0009058;GO:0009987;GO:0016020	S;S;S;S	nan	nan	AT5G49540, comp189376_c0_seq1, comp191693_c0_seq1, gg_02195, gg_03444	nan	nan	nan	nan
Y1743	biogrid, uniprot	0.001521	B	down	comp202772_c0_seq1	nan	comp200167_c1_seq1	GO:0000165;GO:0002679;GO:0004674;GO:0005524;GO:0005739;GO:0005886;GO:0006468;GO:0006612;GO:0007169;GO:0009581;GO:0009595;GO:0009862;GO:0009867;GO:0010200;GO:0010310;GO:0010363;GO:0030968;GO:0031348;GO:0042742;GO:0043069;GO:0050832;GO:0052542;GO:0061025;GO:0005886;GO:0000165;GO:0002679;GO:0005739;GO:0006612;GO:0009581;GO:0009595;GO:0009862;GO:0009867;GO:0010200;GO:0010310;GO:0010363;GO:0030968;GO:…	T;T;T;T;T;T	nan	nan	AT1G74360, comp156857_c0_seq1, comp200167_c1_seq1, comp202772_c0_seq1, comp156857_c0_seq1, comp200167_c1_seq1, comp202772_c0_seq1	RLP, RLK	comp202772_c0_seq1:ROS; comp202772_c0_seq1:ROS	nan	nan
AT1G51790	biogrid	0.003042	B	nan	gg_15278	nan	gg_15278	GO:0000166;GO:0006464;GO:0016301	T	nan	nan	AT1G51790, gg_15278	RLP	nan	nan	nan
AT5G47910	biogrid	0.002691	B	down	comp206008_c0_seq1	up	comp189718_c1_seq1	GO:0006952;GO:0055114;GO:0005886;GO:0022626;GO:0016174;GO:0004601;GO:0005509;GO:0009408;GO:0009845;GO:0016021;GO:0016174;GO:0043621;GO:0055114;GO:0006952;GO:0055114;GO:0005886;GO:0022626;GO:0016174;GO:0005634;GO:0005794;GO:0005886;GO:0007231;GO:0009408;GO:0009611;GO:0016174;GO:0033500;GO:0042744;GO:0043069;GO:0050832;GO:0006952;GO:0055114;GO:0005886;GO:0022626;GO:0016174;GO:0005634;GO:0005794;GO:…	P;Q;P;Q;P;Q;P;Q	nan	nan	AT5G47910, comp189718_c1_seq1, comp206008_c0_seq1, comp206008_c4_seq1, gg_05836	TM-CC	comp206008_c4_seq1:ROS	nan	comp189718_c1_seq1:PHOX; comp206008_c0_seq1:PHOX; comp206008_c4_seq1:PHOX; gg_05836:PHOX
AT3G12090	biogrid	0.002457	B	nan	comp201791_c0_seq1	nan	comp201791_c0_seq1	GO:0005886;GO:0000041;GO:0007568	S	nan	nan	AT3G12090, comp201791_c0_seq1	nan	nan	nan	comp201791_c0_seq1:TETRASPANIN
RLK7	biogrid, uniprot	0.003978	B	down	comp204698_c0_seq1	nan	comp204698_c0_seq1	nan	nan	nan	nan	AT1G09970, comp204698_c0_seq1, comp204698_c0_seq1	RLP	nan	nan	nan
AT3G56370	biogrid	0.002223	B	nan	comp197852_c0_seq1	down	comp156829_c0_seq1	GO:0000165;GO:0002764;GO:0005515;GO:0006612;GO:0009697;GO:0009862;GO:0009867;GO:0010200;GO:0010204;GO:0010310;GO:0010359;GO:0010363;GO:0016045;GO:0019199;GO:0031348;GO:0042742;GO:0043900;GO:0050832;GO:0000272;GO:0004674;GO:0005515;GO:0005524;GO:0005886;GO:0005982;GO:0006468;GO:0007169;GO:0007389;GO:0008356;GO:0008361;GO:0009664;GO:0009832;GO:0009926;GO:0010015;GO:0010075;GO:0048653;GO:0000272;GO:…	T;T;T;T;T	nan	nan	AT3G56370, comp112731_c0_seq1, comp145271_c0_seq1, comp156829_c0_seq1, comp197852_c0_seq1, gg_04250, gg_11577	Other, RLK	nan	nan	comp145271_c0_seq1:MCA
AT5G07280	biogrid	0.002223	B	nan	comp163823_c2_seq1	nan	gg_05528	GO:0009886;GO:0048443;GO:0048610;GO:0048869;GO:0005886;GO:0009653;GO:0009908;GO:0048509;GO:0005886;GO:0042277;GO:0009755;GO:0004674;GO:0004713;GO:0005524;GO:0006468;GO:0009554;GO:0009556;GO:0016020;GO:0031410;GO:0048658;GO:0000003;GO:0000166;GO:0004871;GO:0005515;GO:0005737;GO:0005886;GO:0006464;GO:0007049;GO:0007165;GO:0007275;GO:0009536;GO:0009605;GO:0009607;GO:0009653;GO:0009791;GO:0009908;GO:…	S;T;T	nan	nan	AT5G07280, comp159024_c2_seq1, comp163823_c2_seq1, comp176994_c0_seq1, comp202876_c0_seq1, gg_05528	Other, RLK	nan	nan	comp159024_c2_seq1:MCA
AT3G24660	biogrid	0.003042	B	nan	gg_10266	nan	comp931520_c0_seq1	GO:0004674;GO:0005524;GO:0005886;GO:0006468;GO:0007169;GO:0009506;GO:0009855;GO:0009944;GO:0010014;GO:0010075;GO:0004674;GO:0005524;GO:0005886;GO:0006468;GO:0007169;GO:0009506;GO:0009855;GO:0009944;GO:0010014;GO:0010075;GO:0000166;GO:0004871;GO:0005515;GO:0005575;GO:0005886;GO:0006464;GO:0007165;GO:0007275;GO:0009653;GO:0009719;GO:0016301;GO:0038023;GO:0040007	T;T;T	nan	nan	AT3G24660, comp176389_c0_seq1, comp931520_c0_seq1, gg_10266	RLP	nan	nan	nan
SRF7	biogrid, uniprot	0.00573301	C	nan	gg_02512	nan	comp203308_c0_seq1	GO:0004674;GO:0005524;GO:0005576;GO:0005634;GO:0005829;GO:0005886;GO:0006468;GO:0007169;GO:0004674;GO:0005524;GO:0005576;GO:0005634;GO:0005829;GO:0005886;GO:0006468;GO:0007169;GO:0005515;GO:0005886;GO:0006468;GO:0004675;GO:0005576;GO:0005886;GO:0009624;GO:0010075;GO:0016301;GO:0048653;GO:0000166;GO:0005737;GO:0006464;GO:0016020;GO:0016301;GO:0000166;GO:0004871;GO:0005515;GO:0005575;GO:0005886;GO:…	T;T;T;T;T	nan	nan	AT3G14350, comp150802_c0_seq1, comp176258_c0_seq1, comp203308_c0_seq1, gg_02512, gg_08582	Other, RLK, RLP	nan	nan	comp150802_c0_seq1:MCA
AT3G15710	biogrid	0.003393	B	nan	comp199886_c0_seq1	up	comp199886_c0_seq1	GO:0005783;GO:0005886;GO:0006508;GO:0008233;GO:0009507;GO:0009627;GO:0034976	nan	nan	nan	AT3G15710, comp199886_c0_seq1	nan	nan	nan	nan
PEPR2	biogrid, uniprot	0.003276	B	nan	gg_04585	nan	gg_04585	GO:0000166;GO:0006464;GO:0016301;GO:0000166;GO:0006464;GO:0016301	nan	nan	nan	AT1G17750, gg_04585, gg_04585	RLP	nan	nan	nan
PSKR1	biogrid, uniprot	0.003393	B	up	gg_04184	nan	gg_04184	GO:0010073;GO:0050832;GO:0042802;GO:0005515;GO:0004674;GO:0010073;GO:0050832;GO:0042802;GO:0005515;GO:0004674;GO:0004674;GO:0005524;GO:0005886;GO:0006468;GO:0007169;GO:0016301;GO:0000166;GO:0006464;GO:0016020;GO:0016301;GO:0000166;GO:0005737;GO:0006464;GO:0009536;GO:0016020;GO:0016301	T;T;T;T;T;T	nan	nan	AT2G02220, comp171942_c0_seq1, comp200904_c0_seq1, comp204431_c0_seq1, comp791866_c0_seq1, gg_04184, gg_04715	Other, RLK	nan	nan	comp171942_c0_seq1:MCA; comp200904_c0_seq1:MCA; comp204431_c0_seq1:MCA; comp791866_c0_seq1:MCA; gg_04184:MCA; gg_04715:MCA
AT3G13065	biogrid	0.001287	A	nan	nan	nan	comp191760_c0_seq1	nan	nan	nan	nan	AT3G13065, comp191760_c0_seq1	Other	nan	nan	comp191760_c0_seq1:MCA
AT1G17230	biogrid	0.000702001	A	nan	gg_06875	nan	gg_06875	GO:0000165;GO:0004674;GO:0005524;GO:0005886;GO:0006468;GO:0007169;GO:0009814;GO:0000166;GO:0005737;GO:0006464;GO:0007165;GO:0009605;GO:0009607;GO:0009653;GO:0009791;GO:0009908;GO:0016020;GO:0016301;GO:0016740;GO:0000166;GO:0004871;GO:0005515;GO:0005575;GO:0005886;GO:0006464;GO:0007165;GO:0009719;GO:0016301;GO:0038023	T;S;T;T;T	nan	nan	AT1G17230, comp137823_c0_seq1, comp204802_c0_seq1, gg_06875, gg_07669, gg_08644	RLK, Other, RLP	nan	nan	comp137823_c0_seq1:MCA
Q9C9E4	biogrid, uniprot	0.003393	B	nan	nan	up	gg_05737	GO:0000166;GO:0005623;GO:0006464;GO:0016020;GO:0016301	T	nan	nan	AT1G72460, gg_05737	Other	nan	nan	nan
O22138	biogrid, uniprot	0.00631801	C	nan	gg_04304	up	gg_04304	GO:0004674;GO:0005524;GO:0005886;GO:0006468;GO:0007169;GO:0010075;GO:0005886;GO:0007165;GO:0016301;GO:0000166;GO:0005737;GO:0006464;GO:0016020;GO:0016301;GO:0004674;GO:0005524;GO:0005886;GO:0006468;GO:0007169;GO:0010075;GO:0005886;GO:0007165;GO:0016301;GO:0000166;GO:0005737;GO:0006464;GO:0016020;GO:0016301	T;T;T;T	gg_04304:CW; gg_04304:CW	nan	AT2G45340, comp151753_c1_seq1, comp159151_c0_seq1, gg_04304, comp151753_c1_seq1, comp159151_c0_seq1, gg_04304	Other, RLK	nan	nan	comp159151_c0_seq1:MCA; comp159151_c0_seq1:MCA
