# Supplementary material for: Arabidopsis-Based Dual-Layered Biological Network Analysis Elucidates Fully Modulated Pathways Related to Sugarcane Resistance on Biotrophic Pathogen Infection
Source: Front Plant Sci. 2021 Aug 19;12:707904. doi: 10.3389/fpls.2021.707904 (PMC8417329; doi:10.3389/fpls.2021.707904)
Supplement: Supplementary file 10 [file Table_8.xlsx]

## Sheet: Sheet1
Supplemental Table 8. Saccharum spontaneum (AP85-441) orthologs of predicted sugarcane RGA-DE found within core-periphery sub-networks.
SequenceID	RGA class	RGA cluster	Experiment DE	Chromosome (Chr)	Chr start	Chr stop	MCODE42	Orthogroup
Sspon.001B0011730	RLK	nan	IAC	1	27639066	27643826	no	GRU197
Sspon.001A0019410	RLK	nan	IAC	1	47234556	47237912	no	GRU281
Sspon.001A0013430	RLP	nan	IAC	1	30939733	30942276	no	GRU281
Sspon.001A0031451	CN	nan	IAC	1	89791728	89793769	no	GRU61
Sspon.001C0031261	CNL	nan	IAC	1	89918561	89927791	no	GRU61
Sspon.001A0040801	Other	nan	IAC	1	108896699	108900412	no	GRU61
Sspon.001A0031461	TM-CC	nan	IAC	1	89799498	89806128	no	GRU64
Sspon.001A0001851	TM-CC	0	IAC	1	5185355	5193151	no	GRU64
Sspon.002A0030060	Other	6	IAC	2	78212426	78217662	no	GRU248
Sspon.002D0025130	Other	nan	IAC	2	68834875	68836626	no	GRU248
Sspon.002A0021990	RLK	nan	IAC	2	49511928	49515567	no	GRU281
Sspon.002A0021890	RLK	nan	IAC	2	49286878	49290410	no	GRU281
Sspon.002A0030050	TM-CC	6	IAC	2	78129818	78135558	no	GRU64
Sspon.002A0019300	TM-CC	nan	IAC	2	40834368	40836323	no	GRU9138
Sspon.003B0009210	RLK	nan	IAC	3	19390410	19404280	no	GRU197
Sspon.003C0011950	RLK	nan	IAC	3	26555728	26560141	no	GRU197
Sspon.003A0009240	RLK	nan	IAC	3	20500028	20503387	no	GRU281
Sspon.004A0001850	TM-CC	nan	IAC	4	5217709	5220710	no	GRU64
Sspon.005A0003850	CNL	2	IAC	5	8707260	8712409	no	GRU123
Sspon.005A0003840	CNL	2	IAC	5	8691934	8697138	no	GRU123
Sspon.005A0026100	CNL	nan	IAC	5	85837992	85909359	no	GRU123
Sspon.005C0000611	CNL	nan	IAC	5	1463075	1472650	no	GRU123
Sspon.005C0000612	Other	nan	IAC	5	1472674	1476987	no	GRU123
Sspon.005A0003811	RLP	2	IAC	5	8663368	8667455	no	GRU123
Sspon.005A0009301	Other	nan	IAC	5	22206264	22210533	no	GRU1678
Sspon.005D0023172	RLK	nan	IAC	5	64543502	64548199	no	GRU197
Sspon.005C0024531	Other	nan	IAC	5	84714192	84716901	no	GRU248
Sspon.005B0018180	Other	nan	IAC	5	59197632	59202598	no	GRU248
Sspon.005C0022660	CN	18	IAC	5	80817940	80821200	no	GRU61
Sspon.005C0021600	CNL	nan	IAC	5	76381408	76387751	no	GRU61
Sspon.005D0026022	CNL	nan	IAC	5	74629450	74640841	no	GRU61
Sspon.005C0021640	CNL	nan	IAC	5	76469569	76478824	no	GRU61
Sspon.005C0021630	CNL	nan	IAC	5	76399697	76410715	no	GRU61
Sspon.005C0021690	CNL	nan	IAC	5	76577484	76590836	no	GRU61
Sspon.005C0021670	CNL	nan	IAC	5	76556909	76563149	no	GRU61
Sspon.005C0022600	Other	18	IAC	5	80638334	80639729	no	GRU61
Sspon.005A0024171	Other	nan	IAC	5	78940137	78949949	no	GRU61
Sspon.005A0024220	Other	13	IAC	5	79400187	79407538	no	GRU61
Sspon.005C0021660	Other	nan	IAC	5	76530865	76542518	no	GRU61
Sspon.005D0025882	Other	nan	IAC	5	74046069	74048135	no	GRU61
Sspon.005A0002980	TM-CC	1	IAC	5	6451151	6457954	no	GRU64
Sspon.006A0010181	RLK	nan	IAC	6	31644095	31647706	no	GRU281
Sspon.006A0025951	Other	nan	IAC	6	104556343	104560739	no	GRU61
Sspon.007D0003325	Other	nan	IAC	7	6347900	6351204	no	GRU123
Sspon.007A0003700	RLP	nan	IAC	7	6779310	6853418	no	GRU123
Sspon.007B0014340	Other	nan	IAC	7	41969756	41974727	no	GRU197
Sspon.007A0009431	RLK	3	IAC	7	19020701	19025408	no	GRU197
Sspon.007A0014370	RLK	nan	IAC	7	36484209	36489537	no	GRU197
Sspon.007A0026394	RLP	nan	IAC	7	70726569	70731485	no	GRU197
Sspon.008A0017790	RLP	nan	IAC	8	57323205	57324369	no	GRU4008
Sspon.001A0027660	TM-CC	nan	Shared	1	81311826	81316073	no	GRU165
Sspon.001A0027661	TM-CC	nan	Shared	1	81323834	81330797	no	GRU165
Sspon.001A0041790	TM-CC	nan	Shared	1	110516689	110518814	no	GRU165
Sspon.001A0028222	RLK	nan	Shared	1	82369917	82381446	no	GRU2
Sspon.001B0003350	Other	nan	Shared	1	7739432	7741255	no	GRU4
Sspon.001C0023860	Other	nan	Shared	1	72846792	72848821	yes	GRU6
Sspon.001B0040001	Other	nan	Shared	1	105093657	105096718	yes	GRU6
Sspon.001A0036502	Other	7	Shared	1	101063590	101067110	yes	GRU6
Sspon.001A0020090	RLK	nan	Shared	1	51281152	51285910	yes	GRU6
Sspon.001A0002680	RLK	nan	Shared	1	6851899	6855605	yes	GRU6
Sspon.001A0010970	RLK	nan	Shared	1	25801200	25805199	yes	GRU6
Sspon.001A0023840	RLK	nan	Shared	1	71873648	71877034	yes	GRU6
Sspon.001A0011400	RLK	nan	Shared	1	27054452	27057588	yes	GRU6
Sspon.001A0011340	RLK	nan	Shared	1	26943328	26946065	yes	GRU6
Sspon.001B0028330	RLK	nan	Shared	1	77638674	77642579	yes	GRU6
Sspon.001A0019502	RLK	nan	Shared	1	47724968	47727827	yes	GRU6
Sspon.002C0025170	Other	nan	Shared	2	65856763	65858271	no	GRU2
Sspon.002A0028041	Other	nan	Shared	2	72530446	72535396	no	GRU2
Sspon.002A0036990	Other	nan	Shared	2	100265854	100269919	no	GRU2
Sspon.002C0018900	RLK	nan	Shared	2	40947222	40950963	no	GRU2
Sspon.002A0029040	RLK	4	Shared	2	75332106	75334925	no	GRU2
Sspon.002C0028750	RLK	nan	Shared	2	76505764	76510543	no	GRU2
Sspon.002D0014940	RLP	nan	Shared	2	32007489	32010068	no	GRU2
Sspon.002A0042381	RLP	16	Shared	2	115724230	115732069	no	GRU2
Sspon.002A0009350	CNL	nan	Shared	2	20788870	20792355	no	GRU4
Sspon.002C0000190	CNL	23	Shared	2	1204290	1207748	no	GRU4
Sspon.002B0004370	Other	nan	Shared	2	11579306	11585086	no	GRU4
Sspon.002A0039070	Other	nan	Shared	2	106585903	106590007	no	GRU4
Sspon.002A0002870	Other	nan	Shared	2	6911454	6914854	no	GRU4
Sspon.002C0000161	Other	23	Shared	2	1152072	1159563	no	GRU4
Sspon.002A0038450	Other	nan	Shared	2	104709520	104713907	no	GRU4
Sspon.002A0021140	Other	nan	Shared	2	46330366	46334099	no	GRU4
Sspon.002A0015600	Other	nan	Shared	2	32138583	32142053	yes	GRU6
Sspon.002B0013180	Other	nan	Shared	2	30682087	30685458	yes	GRU6
Sspon.002A0028931	Other	4	Shared	2	75009629	75012824	yes	GRU6
Sspon.002B0026040	Other	21	Shared	2	73653234	73660932	yes	GRU6
Sspon.002B0026310	Other	21	Shared	2	73869467	73871931	yes	GRU6
Sspon.002D0020540	RLK	nan	Shared	2	56344819	56349257	yes	GRU6
Sspon.002B0026141	RLK	21	Shared	2	73795720	73808810	yes	GRU6
Sspon.002B0008330	RLK	nan	Shared	2	21062379	21066185	yes	GRU6
Sspon.002B0026080	RLK	21	Shared	2	73714604	73717870	yes	GRU6
Sspon.002A0021000	RLK	nan	Shared	2	45950878	45955717	yes	GRU6
Sspon.002B0039700	RLK	nan	Shared	2	112241091	112244500	yes	GRU6
Sspon.002A0031290	RLK	nan	Shared	2	82495189	82499593	yes	GRU6
Sspon.002B0013201	RLK	nan	Shared	2	30710857	30714379	yes	GRU6
Sspon.002A0043180	RLP	nan	Shared	2	119766322	119769333	yes	GRU6
Sspon.002A0009580	RLP	nan	Shared	2	21537274	21541314	yes	GRU6
Sspon.003B0017960	Other	nan	Shared	3	40151548	40153982	no	GRU2
Sspon.003A0025730	Other	8	Shared	3	64036392	64039680	no	GRU2
Sspon.003A0025780	RLK	8	Shared	3	64128475	64131735	no	GRU2
Sspon.003A0025670	RLK	8	Shared	3	63945220	63948319	no	GRU2
Sspon.003C0008670	RLK	nan	Shared	3	17391375	17394533	no	GRU2
Sspon.003B0030730	RLP	nan	Shared	3	87423570	87426810	no	GRU2
Sspon.003D0022920	RLP	nan	Shared	3	50720068	50723315	no	GRU2
Sspon.003A0025810	RLP	8	Shared	3	64229271	64243625	no	GRU2
Sspon.003D0022890	RLP	nan	Shared	3	50708611	50711860	no	GRU2
Sspon.003B0029980	RLP	nan	Shared	3	86398333	86404810	no	GRU2
Sspon.003A0008280	Other	nan	Shared	3	18464895	18469520	yes	GRU6
Sspon.003C0008410	RLK	nan	Shared	3	16663714	16669513	yes	GRU6
Sspon.003D0010810	RLK	nan	Shared	3	23472434	23475673	yes	GRU6
Sspon.003B0006510	RLK	nan	Shared	3	13386423	13391267	yes	GRU6
Sspon.003A0031500	RLK	nan	Shared	3	76483914	76487613	yes	GRU6
Sspon.003B0004070	RLK	nan	Shared	3	8412272	8416153	yes	GRU6
Sspon.003A0008290	RLK	nan	Shared	3	18494895	18502527	yes	GRU6
Sspon.003C0015930	RLP	nan	Shared	3	33716330	33718329	yes	GRU6
Sspon.003A0027270	RLP	nan	Shared	3	66452691	66456211	yes	GRU6
Sspon.004B0027400	CNL	nan	Shared	4	76546612	76549353	no	GRU103
Sspon.004A0019240	Other	nan	Shared	4	56734837	56738771	no	GRU2
Sspon.004C0022710	Other	nan	Shared	4	70511580	70532370	no	GRU2
Sspon.004B0012730	RLK	nan	Shared	4	28504288	28506971	no	GRU2
Sspon.004B0012800	RLK	nan	Shared	4	28652508	28655192	no	GRU2
Sspon.004A0008480	RLP	nan	Shared	4	19222154	19225945	no	GRU2
Sspon.004A0010390	RLP	3	Shared	4	23867853	23873158	no	GRU2
Sspon.004A0008430	RLP	nan	Shared	4	19126246	19130037	no	GRU2
Sspon.004A0013450	RLP	nan	Shared	4	32682085	32685361	no	GRU2
Sspon.004A0020060	Other	nan	Shared	4	58674770	58678802	no	GRU4
Sspon.004A0017890	RLK	nan	Shared	4	52171695	52182539	yes	GRU6
Sspon.004A0017100	RLK	nan	Shared	4	48511888	48513262	yes	GRU6
Sspon.004A0020270	RLK	nan	Shared	4	58903807	58907397	yes	GRU6
Sspon.004D0024430	RLK	nan	Shared	4	73684152	73687174	yes	GRU6
Sspon.004C0023670	RLK	nan	Shared	4	72473648	72482596	yes	GRU6
Sspon.004A0026260	RLK	nan	Shared	4	72284353	72318130	yes	GRU6
Sspon.005A0021491	CNL	nan	Shared	5	67613214	67616284	no	GRU103
Sspon.005B0019420	CNL	nan	Shared	5	67590587	67598918	no	GRU103
Sspon.005B0019480	Other	nan	Shared	5	67779678	67793575	no	GRU103
Sspon.005B0019440	Other	nan	Shared	5	67626063	67632521	no	GRU103
Sspon.005C0018480	Other	nan	Shared	5	62531430	62537915	no	GRU103
Sspon.005A0021710	Other	9	Shared	5	68645602	68648322	no	GRU103
Sspon.005A0021660	Other	9	Shared	5	68216479	68220547	no	GRU103
Sspon.005A0017391	Other	nan	Shared	5	48727611	48730885	no	GRU2
Sspon.005B0021830	Other	nan	Shared	5	77374104	77377294	no	GRU2
Sspon.005A0023781	Other	12	Shared	5	77542807	77545920	no	GRU2
Sspon.005B0024430	Other	nan	Shared	5	88376675	88379736	no	GRU2
Sspon.005A0024000	Other	nan	Shared	5	78096667	78105176	no	GRU2
Sspon.005A0023120	Other	nan	Shared	5	75270450	75273714	no	GRU2
Sspon.005A0023121	Other	nan	Shared	5	75299004	75301948	no	GRU2
Sspon.005B0022230	RLK	nan	Shared	5	79002743	79006418	no	GRU2
Sspon.005A0017340	RLK	nan	Shared	5	48663166	48666905	no	GRU2
Sspon.005A0025250	RLK	nan	Shared	5	83160702	83163786	no	GRU2
Sspon.005A0017350	RLK	nan	Shared	5	48669303	48672020	no	GRU2
Sspon.005C0019590	RLK	nan	Shared	5	67459768	67462100	no	GRU2
Sspon.005A0017410	RLK	nan	Shared	5	48889445	48892187	no	GRU2
Sspon.005A0003680	RLP	2	Shared	5	8238115	8241966	no	GRU2
Sspon.005C0017091	RLP	nan	Shared	5	53760407	53771133	no	GRU2
Sspon.005A0025320	RLP	nan	Shared	5	83416922	83420072	no	GRU2
Sspon.005A0023750	RLP	12	Shared	5	77364884	77369512	no	GRU2
Sspon.005B0019740	CNL	nan	Shared	5	68754608	68758272	no	GRU4
Sspon.005A0021640	CNL	9	Shared	5	68200248	68206015	no	GRU4
Sspon.005C0023191	CNL	nan	Shared	5	82206880	82214959	no	GRU4
Sspon.005B0019720	CNL	nan	Shared	5	68728155	68734715	no	GRU4
Sspon.005A0024890	CNL	nan	Shared	5	81722733	81729138	no	GRU4
Sspon.005A0021740	CNL	9	Shared	5	68796309	68800522	no	GRU4
Sspon.005A0025660	Other	nan	Shared	5	84655315	84663172	no	GRU4
Sspon.005B0019750	Other	nan	Shared	5	68789216	68793382	no	GRU4
Sspon.005A0025861	Other	14	Shared	5	85353210	85356237	no	GRU4
Sspon.005A0021730	Other	9	Shared	5	68748662	68750681	no	GRU4
Sspon.005B0019760	Other	nan	Shared	5	68814816	68820645	no	GRU4
Sspon.005A0023980	Other	nan	Shared	5	78079925	78083861	no	GRU4
Sspon.005B0018510	Other	nan	Shared	5	61290169	61291005	no	GRU4
Sspon.005A0021801	Other	nan	Shared	5	69249919	69256216	yes	GRU6
Sspon.005A0019330	RLK	8	Shared	5	57124527	57128078	yes	GRU6
Sspon.005B0019790	RLK	nan	Shared	5	69119888	69123085	yes	GRU6
Sspon.005B0008150	RLK	nan	Shared	5	17424589	17429613	yes	GRU6
Sspon.006A0024730 (Xa21)	RLK	16	Shared	6	98011730	98015237	no	GRU2
Sspon.006C0019842 (Xa21)	RLK	nan	Shared	6	68654168	68657620	no	GRU2
Sspon.006A0014620 (Xa21)	RLK	nan	Shared	6	58116717	58119979	no	GRU2
Sspon.006B0020110 (Xa21)	RLK	nan	Shared	6	68528024	68530852	no	GRU2
Sspon.006A0023840 (Xa21)	RLK	nan	Shared	6	95151967	95155240	no	GRU2
Sspon.006D0018380 (Xa21)	RLK	nan	Shared	6	60785909	60789304	no	GRU2
Sspon.006A0019170 (Xa21)	RLP	nan	Shared	6	74787831	74794212	no	GRU2
Sspon.006B0018790 (RPP13)	CN	nan	Shared	6	61323033	61337272	no	GRU4
Sspon.006C0021170 (RPP13)	CNL	nan	Shared	6	73301350	73305323	no	GRU4
Sspon.006A0018090 (RPP13)	CNL	nan	Shared	6	69799813	69804316	no	GRU4
Sspon.006D0016812 (RPP13)	Other	nan	Shared	6	53453351	53455718	no	GRU4
Sspon.006A0018010 (RPP13)	Other	nan	Shared	6	69120781	69124518	no	GRU4
Sspon.006A0020620 (RPP13)	Other	nan	Shared	6	84480984	84485267	no	GRU4
Sspon.006B0025480 (RPP13)	Other	nan	Shared	6	87198476	87214227	no	GRU4
Sspon.006B0019112 (RPP13)	Other	nan	Shared	6	63158418	63160002	no	GRU4
Sspon.006B0015670 (CEPR2)	Other	19	Shared	6	52010449	52013923	yes	GRU6
Sspon.006A0015991 (CEPR2)	Other	nan	Shared	6	63186306	63189413	yes	GRU6
Sspon.006A0009040 (CEPR2)	Other	4	Shared	6	25340263	25344074	yes	GRU6
Sspon.006A0009061 (CEPR2)	Other	4	Shared	6	25493316	25497356	yes	GRU6
Sspon.006A0000030 (CEPR2)	RLK	nan	Shared	6	136481	139967	yes	GRU6
Sspon.006B0000421 (CEPR2)	RLK	nan	Shared	6	1398171	1401560	yes	GRU6
Sspon.006A0009670 (CEPR2)	RLK	nan	Shared	6	26946175	26949253	yes	GRU6
Sspon.006A0007256 (CEPR2)	RLK	nan	Shared	6	18418489	18420853	yes	GRU6
Sspon.007D0027330	Other	nan	Shared	7	84585121	84586896	no	GRU2
Sspon.007D0016320	Other	nan	Shared	7	48539609	48541585	no	GRU2
Sspon.007D0027230	Other	nan	Shared	7	84524168	84527626	no	GRU2
Sspon.007A0027520	RLK	nan	Shared	7	74670144	74672783	no	GRU2
Sspon.007B0026500	RLK	nan	Shared	7	75329376	75333344	no	GRU2
Sspon.007B0024040	RLK	nan	Shared	7	67403516	67408500	no	GRU2
Sspon.007B0025800	RLP	nan	Shared	7	73345115	73353075	no	GRU2
Sspon.007A0002080	RLP	nan	Shared	7	3982738	3985725	no	GRU2
Sspon.007C0017692	RLP	nan	Shared	7	56671163	56674088	no	GRU2
Sspon.007A0015720	RLP	4	Shared	7	43085003	43088286	no	GRU2
Sspon.007A0017650	RLP	nan	Shared	7	48737035	48740275	no	GRU2
Sspon.007A0016350	CNL	nan	Shared	7	44958277	44968952	no	GRU4
Sspon.007A0016240	CNL	nan	Shared	7	44487474	44495779	no	GRU4
Sspon.007B0016501	CNL	nan	Shared	7	50541595	50547095	no	GRU4
Sspon.007A0019870	CNL	5	Shared	7	53872439	53876870	no	GRU4
Sspon.007A0019930	CNL	5	Shared	7	53955665	53962153	no	GRU4
Sspon.007D0026000	CNL	nan	Shared	7	81424463	81426045	no	GRU4
Sspon.007A0019860	Other	5	Shared	7	53837675	53845922	no	GRU4
Sspon.007A0024020	Other	6	Shared	7	63553552	63563220	no	GRU4
Sspon.007A0024040	Other	6	Shared	7	63601270	63603804	no	GRU4
Sspon.007B0024450	Other	nan	Shared	7	68239739	68242270	no	GRU4
Sspon.007A0024030	Other	6	Shared	7	63581903	63584969	no	GRU4
Sspon.007A0019960	Other	5	Shared	7	53990120	53993799	no	GRU4
Sspon.007A0026980	RLK	nan	Shared	7	72881663	72884938	yes	GRU6
Sspon.007B0026931	RLK	nan	Shared	7	76061778	76064930	yes	GRU6
Sspon.007C0023520	RLK	nan	Shared	7	73595185	73597996	yes	GRU6
Sspon.007A0015630	RLK	4	Shared	7	42930022	42933419	yes	GRU6
Sspon.007A0005101	RLK	1	Shared	7	9771073	9774537	yes	GRU6
Sspon.007A0027000	RLP	nan	Shared	7	72960594	72963428	yes	GRU6
Sspon.007A0015550	RLP	nan	Shared	7	42837909	42840836	yes	GRU6
Sspon.008D0004521	Other	nan	Shared	8	9562442	9583982	no	GRU2
Sspon.008B0021871	Other	nan	Shared	8	62511441	62515249	no	GRU2
Sspon.008A0016331	RLK	nan	Shared	8	54192527	54202468	no	GRU2
Sspon.008C0016210	RLK	nan	Shared	8	52227571	52238247	no	GRU2
Sspon.008A0008840	RLK	nan	Shared	8	21492519	21495544	no	GRU2
Sspon.008A0016350	RLK	nan	Shared	8	54207529	54210308	no	GRU2
Sspon.008B0004522	RLP	nan	Shared	8	7562115	7574892	no	GRU2
Sspon.008A0008861	RLP	nan	Shared	8	21515968	21532045	no	GRU2
Sspon.008A0004691	RLP	5	Shared	8	10487121	10492497	no	GRU2
Sspon.008A0009370	RLK	nan	Shared	8	23766632	23769886	yes	GRU6
Sspon.008A0008683	RLK	nan	Shared	8	21073888	21077543	yes	GRU6
Sspon.008B0011170	RLK	nan	Shared	8	26920993	26924123	yes	GRU6
Sspon.008A0009371	RLK	nan	Shared	8	23811930	23815263	yes	GRU6
Sspon.008A0001871	RLK	nan	Shared	8	4422142	4425913	yes	GRU6
Sspon.001A0018020	RLK	nan	SP	1	42342233	42344774	no	GRU1090
Sspon.001D0044620	Other	nan	SP	1	108843594	108853795	no	GRU120
Sspon.001C0005172	RLK	nan	SP	1	11569433	11594500	yes	GRU139
Sspon.001A0021370	RLK	nan	SP	1	62685485	62689060	yes	GRU139
Sspon.001A0005020	RLK	nan	SP	1	12325991	12332082	yes	GRU139
Sspon.001A0013970	RLP	nan	SP	1	31791448	31793743	yes	GRU139
Sspon.001A0032880	TM-CC	6	SP	1	92547071	92551191	no	GRU15
Sspon.001B0026850	TM-CC	nan	SP	1	73808413	73810634	no	GRU15
Sspon.001A0039360	Other	nan	SP	1	106415923	106419180	no	GRU18
Sspon.001B0022411	RLK	nan	SP	1	51676745	51688086	no	GRU197
Sspon.001A0010720	RLK	3	SP	1	24969363	24973852	yes	GRU232
Sspon.001A0010300	RLK	nan	SP	1	23777879	23781770	no	GRU404
Sspon.001C0011402	RLK	nan	SP	1	25883581	25888328	no	GRU404
Sspon.001A0010830	RLK	3	SP	1	25277240	25280644	yes	GRU460
Sspon.001B0011970	TM-CC	nan	SP	1	27914943	27920032	no	GRU463
Sspon.001A0032080	Other	nan	SP	1	90534498	90539120	no	GRU65
Sspon.001B0043470	Other	nan	SP	1	110748815	110751970	no	GRU807
Sspon.001B0012410	Other	nan	SP	1	28840437	28918070	no	GRU823
Sspon.002A0006690	RLK	nan	SP	2	15635404	15642461	no	GRU11278
Sspon.002A0007100	RLK	nan	SP	2	16042867	16048243	no	GRU1290
Sspon.002A0019871	Other	nan	SP	2	42342723	42348493	yes	GRU13028
Sspon.002C0012000	RLK	nan	SP	2	26550332	26554681	yes	GRU139
Sspon.002B0007793	RLP	nan	SP	2	19404956	19406727	yes	GRU139
Sspon.002B0008370	CNL	nan	SP	2	21183613	21190806	no	GRU1390
Sspon.002B0026730	Other	nan	SP	2	74990497	74993248	no	GRU1390
Sspon.002A0025632	TM-CC	nan	SP	2	65079523	65084417	no	GRU15
Sspon.002A0018630	TM-CC	nan	SP	2	38515193	38519319	no	GRU15
Sspon.002B0024671	TM-CC	nan	SP	2	70331338	70335056	no	GRU15
Sspon.002D0026380	Other	24	SP	2	71826018	71828738	no	GRU178
Sspon.002A0037200	Other	nan	SP	2	101151311	101153725	no	GRU178
Sspon.002A0040460	CN	14	SP	2	110025107	110029678	no	GRU18
Sspon.002C0044660	CN	nan	SP	2	125967912	125973981	no	GRU18
Sspon.002B0026840	CN	nan	SP	2	75085142	75086233	no	GRU18
Sspon.002A0029321	CNL	5	SP	2	76346817	76356233	no	GRU18
Sspon.002B0026780	CNL	nan	SP	2	75051277	75057166	no	GRU18
Sspon.002A0040470	CNL	14	SP	2	110039980	110045085	no	GRU18
Sspon.002A0029330	CNL	5	SP	2	76350039	76356233	no	GRU18
Sspon.002A0029300	Other	nan	SP	2	76256483	76269430	no	GRU18
Sspon.002A0029351	Other	5	SP	2	76464181	76475984	no	GRU18
Sspon.002A0029350	Other	5	SP	2	76452152	76454556	no	GRU18
Sspon.002B0026520	Other	nan	SP	2	74273167	74313624	no	GRU2
Sspon.002A0001280	RLK	nan	SP	2	3443022	3445783	yes	GRU232
Sspon.002D0028070	Other	nan	SP	2	75881227	75887094	yes	GRU265
Sspon.002A0020761	RLK	nan	SP	2	44846775	44855964	yes	GRU265
Sspon.002B0018441	RLK	nan	SP	2	43786354	43794393	yes	GRU265
Sspon.002A0027760	RLK	nan	SP	2	71991952	71995783	yes	GRU265
Sspon.002B0003080	RLK	nan	SP	2	8515195	8519472	no	GRU404
Sspon.002A0023572	RLK	nan	SP	2	58812757	58822602	no	GRU404
Sspon.002A0019601	RLP	nan	SP	2	41756301	41760004	no	GRU65
Sspon.002A0018010	TM-CC	nan	SP	2	37106149	37116681	yes	GRU77
Sspon.002B0029070	RLK	nan	SP	2	81242795	81245673	no	GRU807
Sspon.002A0028510	RLK	nan	SP	2	73593249	73596120	no	GRU807
Sspon.003A0015740	RLK	3	SP	3	35290168	35293028	yes	GRU1149
Sspon.003A0007871	TM-CC	0	SP	3	17521575	17526767	no	GRU15
Sspon.003A0013951	RLK	nan	SP	3	30927141	30932346	no	GRU1629
Sspon.003A0030570	RLK	11	SP	3	74320680	74324254	yes	GRU232
Sspon.003A0004630	RLK	nan	SP	3	9915483	9918127	yes	GRU232
Sspon.003B0000820	RLK	nan	SP	3	2194918	2198269	yes	GRU460
Sspon.003A0004433	RLK	nan	SP	3	9615301	9618556	yes	GRU460
Sspon.003B0031620	RLK	nan	SP	3	88977615	88982329	no	GRU65
Sspon.003A0017831	TM-CC	4	SP	3	45058920	45063147	yes	GRU77
Sspon.003A0004590	Other	nan	SP	3	9882652	9888401	no	GRU808
Sspon.004A0021721	RLK	nan	SP	4	62357236	62369409	no	GRU1290
Sspon.004A0020700	RLK	nan	SP	4	59893301	59899101	yes	GRU139
Sspon.004A0018531	RLK	nan	SP	4	54591746	54611322	yes	GRU265
Sspon.004A0018390	Other	nan	SP	4	54230394	54234963	no	GRU65
Sspon.004A0012400	RLK	nan	SP	4	29199847	29205656	no	GRU65
Sspon.004A0005531	RLK	1	SP	4	13061182	13064644	no	GRU65
Sspon.004A0016730	RLK	nan	SP	4	47436565	47441952	no	GRU65
Sspon.005A0027511	RLK	nan	SP	5	89673518	89677718	no	GRU1090
Sspon.005A0018380	Other	nan	SP	5	52955380	52957659	no	GRU120
Sspon.005C0015741	Other	nan	SP	5	47732059	47734106	no	GRU120
Sspon.005A0018390	Other	nan	SP	5	53059480	53062551	no	GRU120
Sspon.005D0020040	Other	nan	SP	5	52125251	52127524	no	GRU120
Sspon.005C0013870	CN	nan	SP	5	37926480	37935140	no	GRU18
Sspon.005A0021601	CN	9	SP	5	68058214	68061691	no	GRU18
Sspon.005A0021580	CNL	nan	SP	5	67906477	67911357	no	GRU18
Sspon.005A0021360	CNL	nan	SP	5	66817168	66885314	no	GRU18
Sspon.005A0005011	RLK	4	SP	5	11476268	11491432	yes	GRU265
Sspon.005A0012790	RLK	nan	SP	5	28798092	28802830	no	GRU65
Sspon.005A0020070	RLK	nan	SP	5	59503632	59515984	no	GRU808
Sspon.005A0020270	RLK	nan	SP	5	59916797	59922029	no	GRU808
Sspon.005A0020021	RLP	nan	SP	5	59403129	59415718	no	GRU808
Sspon.006A0017371 (BAK1)	RLK	nan	SP	6	66835507	66839211	yes	GRU1149
Sspon.006C0010070 (uncharacterized)	Other	nan	SP	6	25841622	25844834	no	GRU120
Sspon.006A0015640 (uncharacterized)	Other	6	SP	6	61727743	61770105	no	GRU120
Sspon.006B0016190 (RPM1)	CNL	nan	SP	6	53013247	53031602	no	GRU1390
Sspon.006A0014890 (CslF6)	TM-CC	nan	SP	6	58702329	58709686	no	GRU15
Sspon.006C0024420 (RPM1)	CN	nan	SP	6	86206203	86287449	no	GRU18
Sspon.006D0025080 (RPM1)	CN	nan	SP	6	89045018	89047561	no	GRU18
Sspon.006B0021340 (RPM1)	CN	nan	SP	6	72457423	72459771	no	GRU18
Sspon.006B0003350 (RPM1)	CN	nan	SP	6	8268583	8270285	no	GRU18
Sspon.006A0004420 (RPM1)	CN	2	SP	6	10039262	10042762	no	GRU18
Sspon.006C0009660 (RPM1)	CNL	nan	SP	6	24396371	24405447	no	GRU18
Sspon.006B0004610 (RPM1)	CNL	nan	SP	6	10350477	10356792	no	GRU18
Sspon.006A0004410 (RPM1)	CNL	2	SP	6	10010408	10016318	no	GRU18
Sspon.006B0003440 (RPM1)	CNL	nan	SP	6	8317997	8323163	no	GRU18
Sspon.006A0023090 (RPM1)	CNL	nan	SP	6	92769918	92778424	no	GRU18
Sspon.006A0021700 (RPM1)	CNL	nan	SP	6	87673491	87680435	no	GRU18
Sspon.006A0004370 (RPM1)	CNL	2	SP	6	9994657	10000270	no	GRU18
Sspon.006A0004421 (RPM1)	CNL	2	SP	6	10051186	10059829	no	GRU18
Sspon.006B0021330 (probable RPM1)	Other	nan	SP	6	72428020	72430743	no	GRU18
Sspon.006A0004450 (probable RPM1)	Other	2	SP	6	10103406	10106705	no	GRU18
Sspon.006B0003380 (probable RPM1)	Other	nan	SP	6	8284789	8293641	no	GRU18
Sspon.006A0004440 (probable RPM1)	Other	2	SP	6	10099327	10102486	no	GRU18
Sspon.006B0003300 (probable RPM1)	Other	nan	SP	6	8219528	8224602	no	GRU18
Sspon.006C0011920 (probable RPM1)	Other	nan	SP	6	40172333	40175936	no	GRU18
Sspon.006C0004020 (probable RPM1)	Other	nan	SP	6	8765455	8772051	no	GRU18
Sspon.006A0012641 (BAK1)	RLK	nan	SP	6	50045301	50053545	yes	GRU265
Sspon.006C0021860 (probable BAK1)	Other	nan	SP	6	75801900	75807724	no	GRU65
Sspon.006A0014041 (BAK1)	RLK	nan	SP	6	55843663	55850352	no	GRU65
Sspon.006D0021430 (BAK1)	RLK	nan	SP	6	73482344	73485046	no	GRU65
Sspon.006A0007370 (BAK1)	RLK	nan	SP	6	18751740	18757244	no	GRU65
Sspon.006A0022850 (BAK1)	RLK	13	SP	6	91638777	91642409	no	GRU65
Sspon.006A0022861 (BAK1)	RLK	13	SP	6	91670659	91677625	no	GRU65
Sspon.007A0022681	RLK	nan	SP	7	59749597	59753522	no	GRU1090
Sspon.007B0015410	TM-CC	nan	SP	7	47101689	47108278	no	GRU15
Sspon.007A0015420	TM-CC	nan	SP	7	42292850	42299720	no	GRU15
Sspon.007A0007280	RLK	2	SP	7	14360093	14363158	yes	GRU232
Sspon.007C0021560	RLK	nan	SP	7	67411047	67416696	no	GRU4236
Sspon.007A0007430	RLK	2	SP	7	14553987	14586936	yes	GRU460
Sspon.007A0007020	TM-CC	nan	SP	7	13930587	13936545	no	GRU463
Sspon.007B0015500	RLP	nan	SP	7	47293212	47305257	no	GRU65
Sspon.007A0015500	RLP	nan	SP	7	42614688	42617771	no	GRU65
Sspon.008A0020652	RLK	nan	SP	8	63849818	63854062	yes	GRU1149
Sspon.008A0006870	RLK	nan	SP	8	16256950	16262801	yes	GRU139
Sspon.008A0003110	Other	2	SP	8	7023993	7027049	no	GRU178
Sspon.008A0003160	Other	2	SP	8	7101290	7104335	no	GRU178
Sspon.008A0012784	RLK	nan	SP	8	43722304	43724139	no	GRU65
